# Supplementary material for: Autophagy-related genes analysis reveals potential biomarkers for prediction of the impaired walking capacity of peripheral arterial disease
Source: Springer Nature journal article supplement (doi:10.1186/s12916-023-02889-5), 2023-05-18

Additional File 3: Figure S1 P62

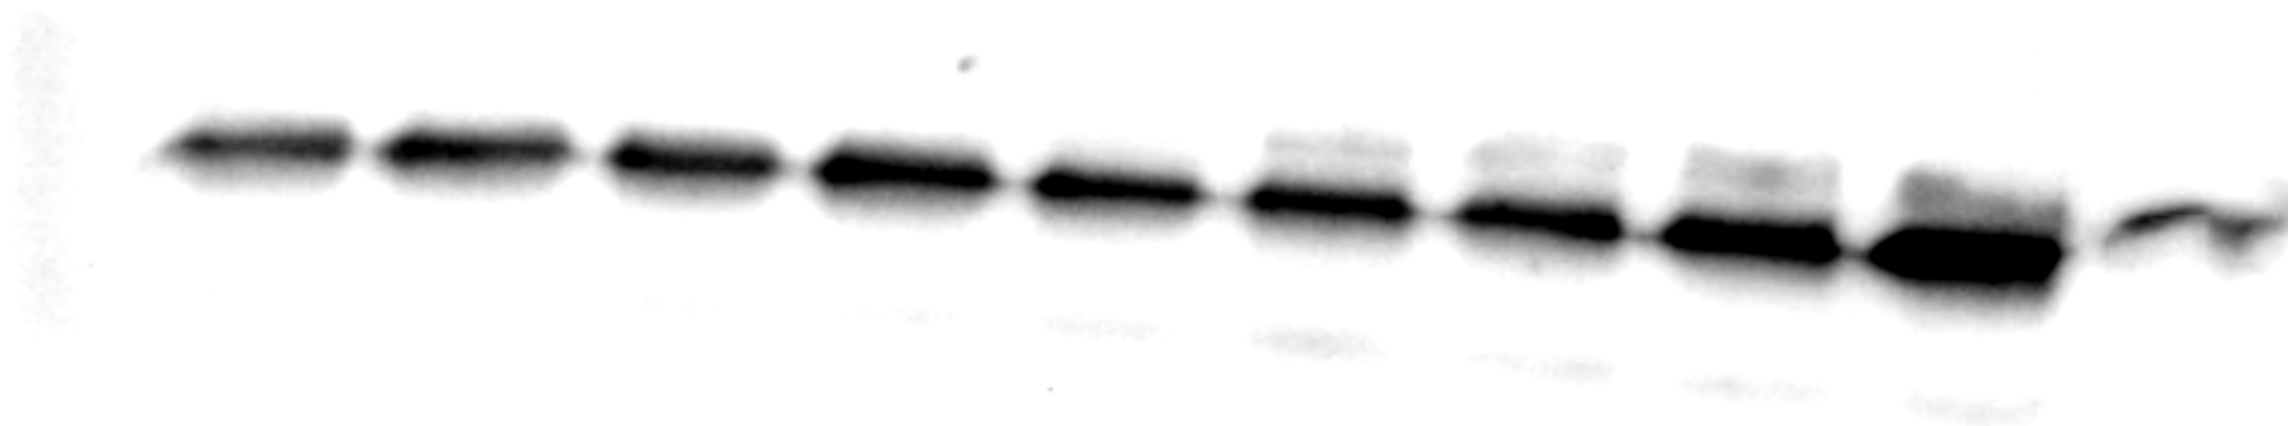

Additional File 3: Figure S2 Beclin1

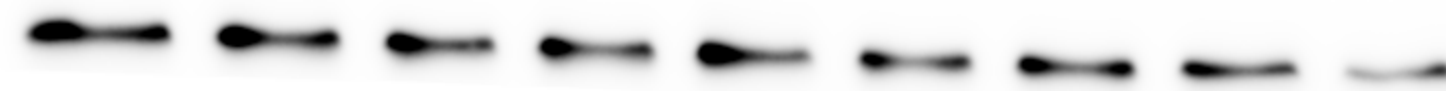

Additional File 3: Figure S3 LC3B

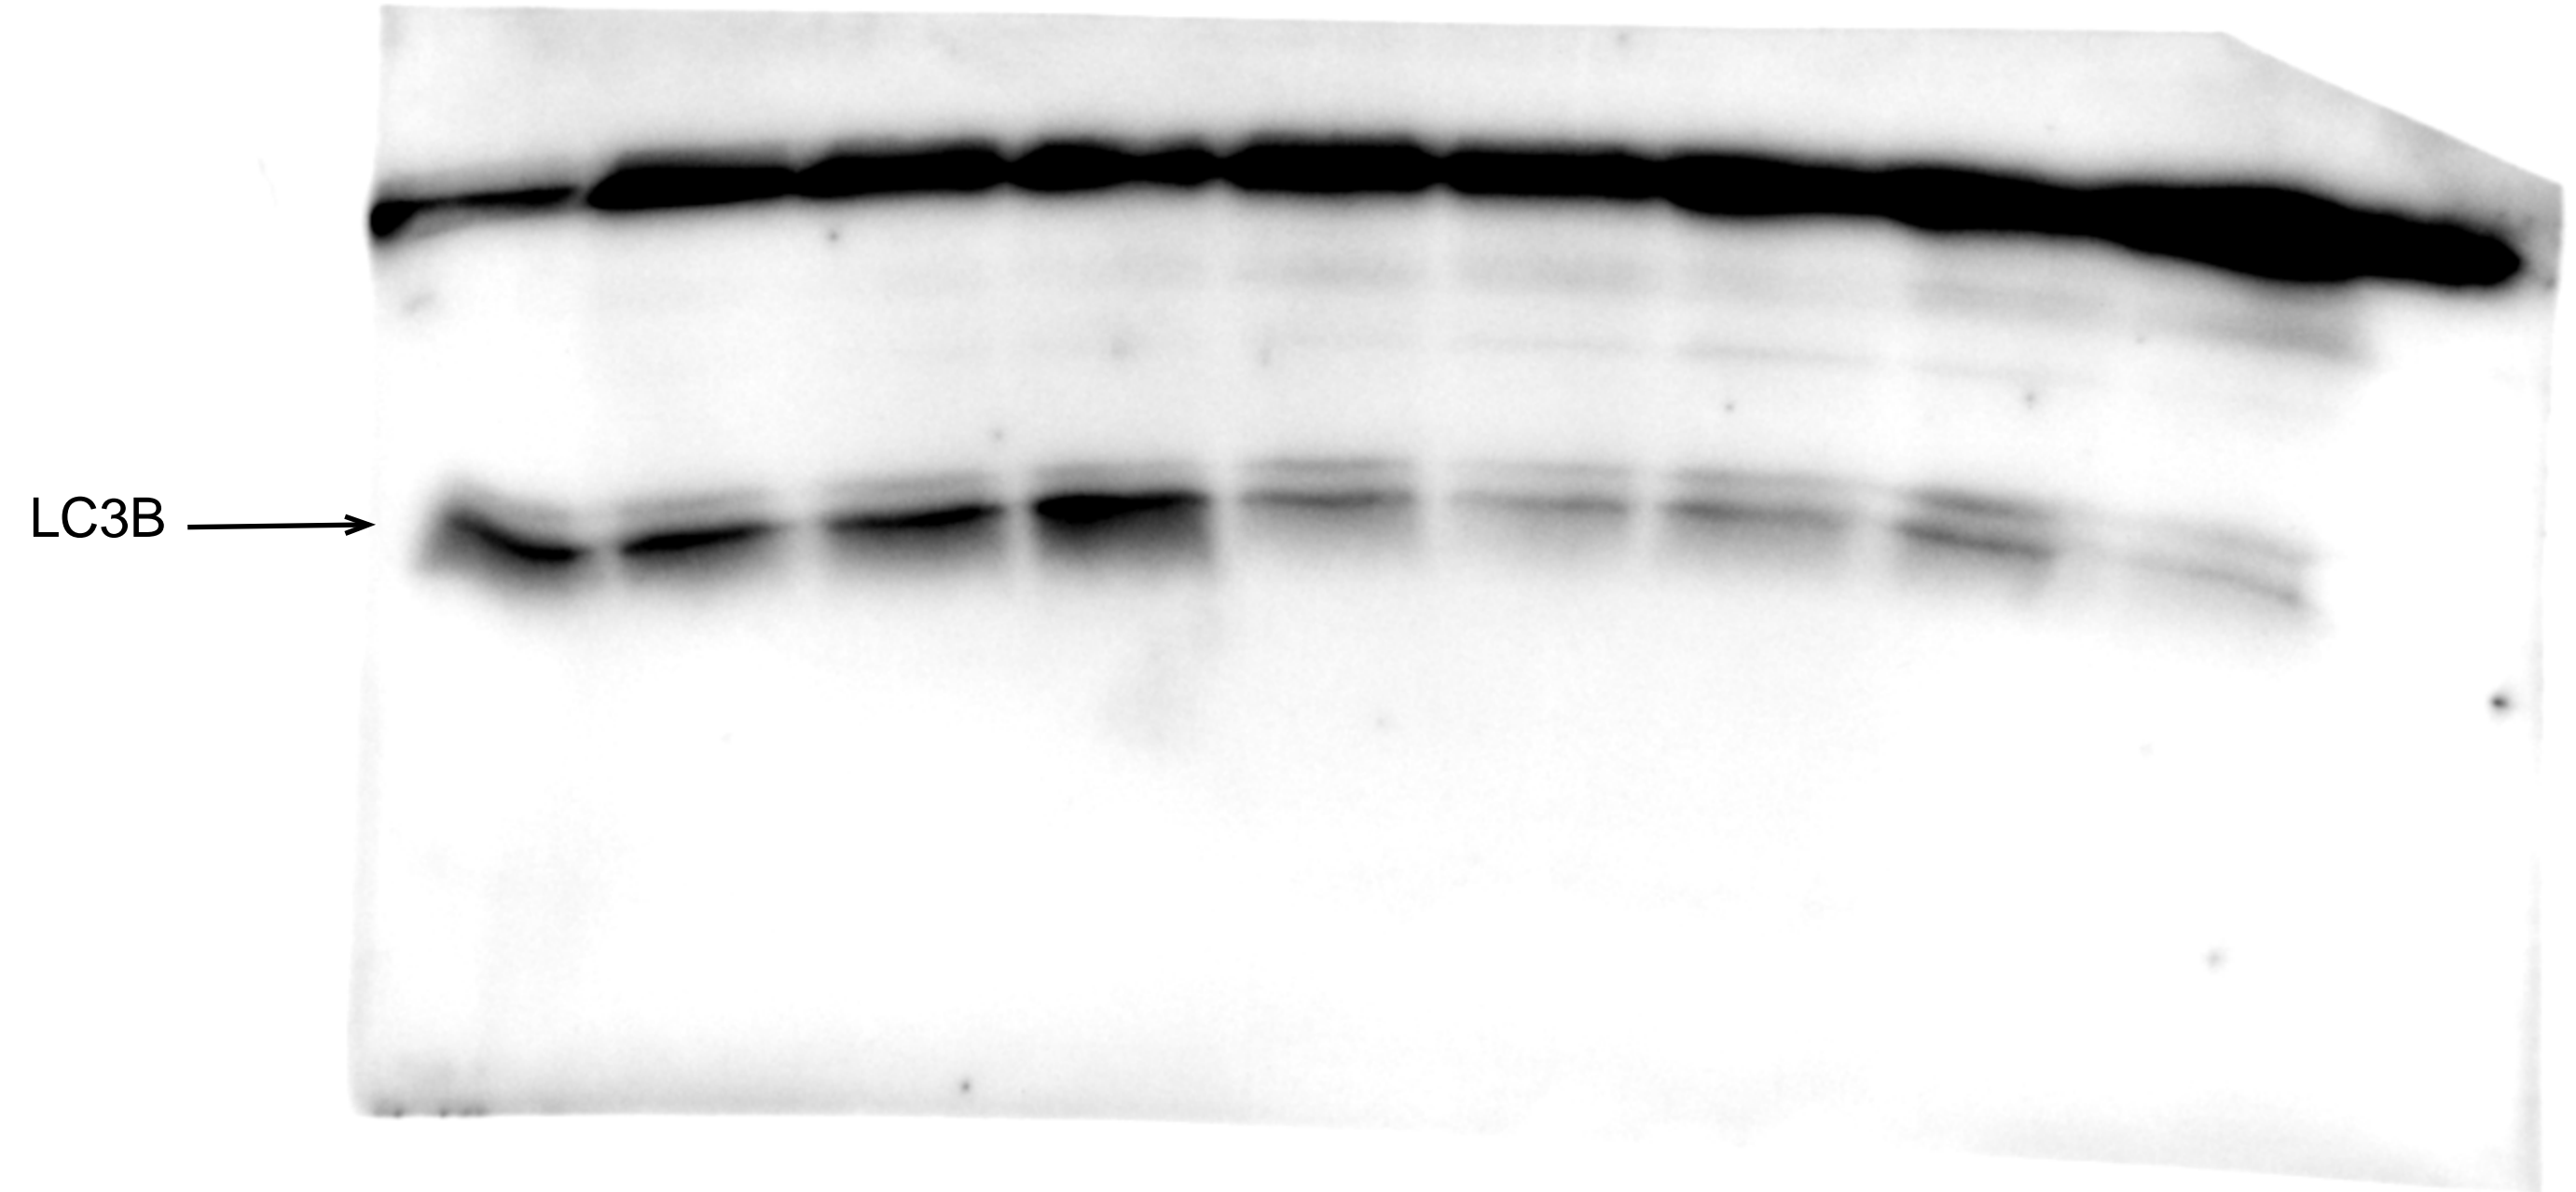

Additional File 3: Figure S4 GAPDH

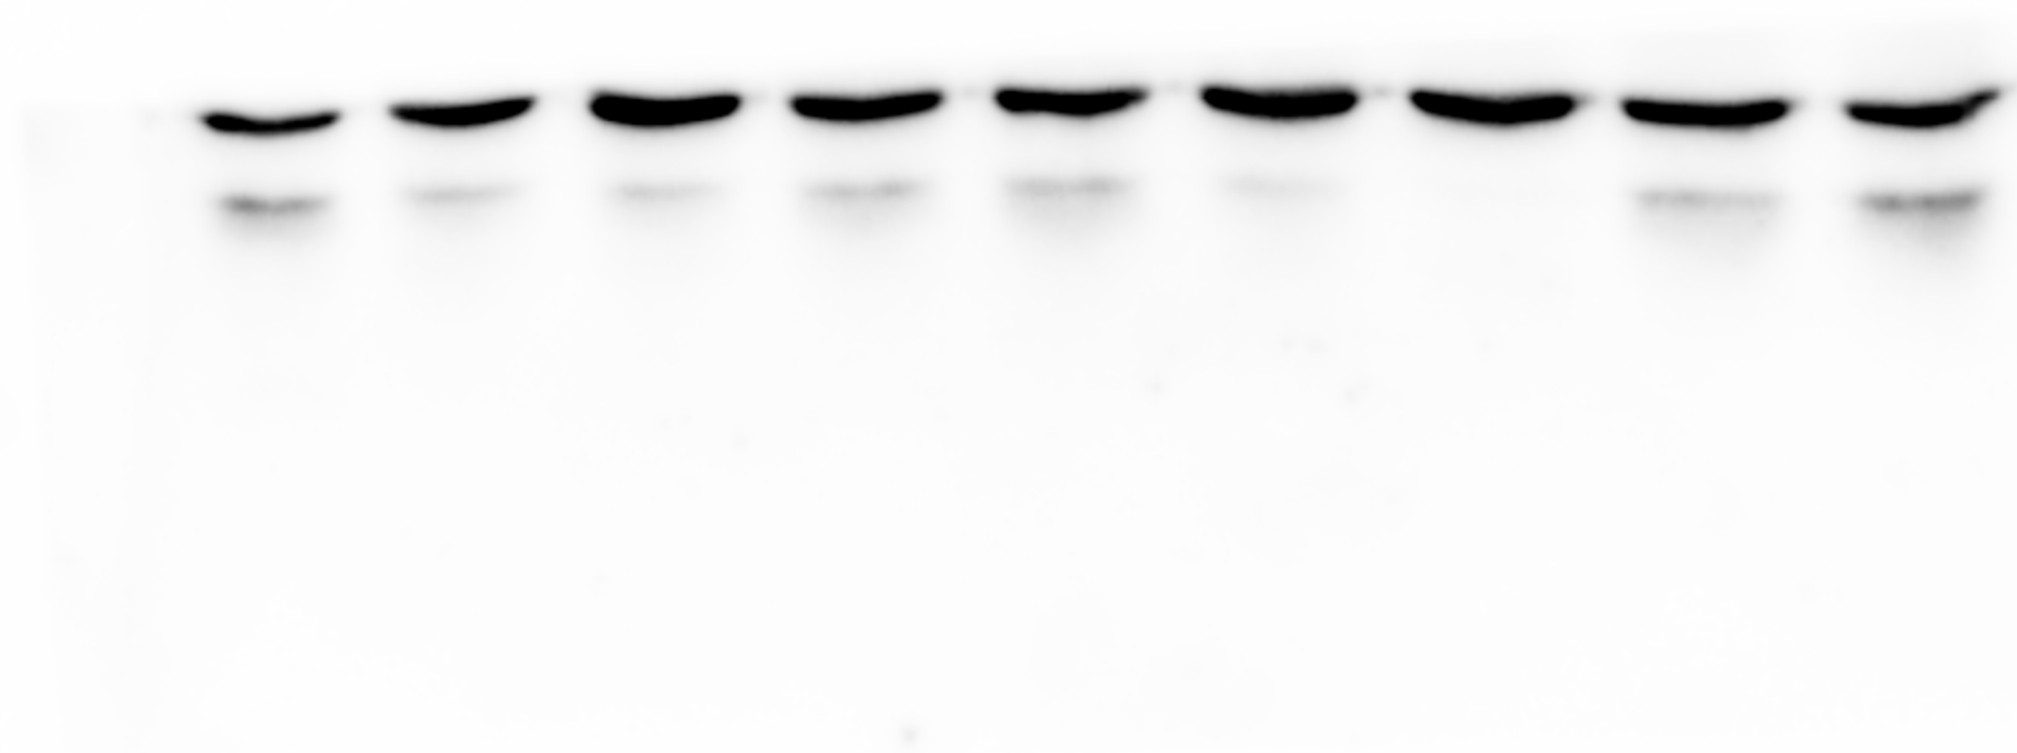

Supplement: MOESM3 [file 25378482]
